# Supplementary material for: High prevalence of multidrug-resistant Gram-negative bacteria carriage in children screened prospectively for multidrug resistant organisms at admission to a paediatric hospital, Hamburg, Germany, September 2018 to May 2019
Source: PubMed Central journal article supplement (PMC9012092; doi:10.2807/1560-7917.es.2022.27.15.2001567), 2022-04-14
Supplement: 20-01567_KOENIGS_SupplementaryData.pdf [file 20-01567_KOENIGS_SupplementaryData.pdf]

## **Supplementary Data**

### **MDRO risk factors and MDRO carriage in children, collected at time of hospital admission, AKK Hamburg, Germany, 2018-2019**

This supplementary material is hosted by Eurosurveillance as supporting information alongside the article [High prevalence of multi-drug-resistant gram-negative bacteria carriage in children at time of hospital admission], on behalf of the authors, who remain responsible for the accuracy and appropriateness of the content. The same standards for ethics, copyright, attributions and permissions as for the article apply. Supplements are not edited by Eurosurveillance and the journal is not responsible for the maintenance of any links or email addresses provided therein.

**Table S1.** MDRO risk factors and MDRO carriage in children, collected at time of hospital admission, AKK Hamburg, Germany, 2018-2019 – part 1

| N           | Risk factor                                                                 | MDRO negative<br>n = 3685 |       | MDRO positive<br>n = 166 |      | Missing<br>n = 113 | Total<br>n = 3964 |      |
|-------------|-----------------------------------------------------------------------------|---------------------------|-------|--------------------------|------|--------------------|-------------------|------|
|             |                                                                             | (n)                       | (%)   | (n)                      | (%)  | (n)                | (n)               | (%)  |
| <b>1.</b>   | <b>History of MRSA</b>                                                      |                           |       |                          |      |                    |                   |      |
|             | No                                                                          | 3655                      | 99.2  | 159                      | 95.8 | 111                | 3925              | 99.0 |
|             | Yes                                                                         | 30                        | 0.8   | 7                        | 4.2  | 2                  | 39                | 1.0  |
| <b>1.1.</b> | <b>Localization of MRSA</b>                                                 |                           |       |                          |      |                    |                   |      |
|             | Nasal/throat                                                                | 16                        | N/A   | 4                        | N/A  | 0                  | 20                | N/A  |
|             | Wound                                                                       | 2                         | N/A   | 1                        | N/A  | 0                  | 3                 | N/A  |
|             | Other                                                                       | 2                         | N/A   | 0                        | N/A  | 0                  | 2                 | N/A  |
|             | Missing                                                                     | 3665                      | 99.5  | 161                      | 97.0 | 113                | 3939              | 99.4 |
| <b>2.</b>   | <b>History of MRGN</b>                                                      |                           |       |                          |      |                    |                   |      |
|             | No                                                                          | 3642                      | 98.8  | 139                      | 83.7 | 112                | 3893              | 98.2 |
|             | Yes                                                                         | 43                        | 1.2   | 27                       | 16.3 | 1                  | 71                | 1.8  |
| <b>2.1.</b> | <b>Localization of MRGN</b>                                                 |                           |       |                          |      |                    |                   |      |
|             | Anal/rectal/stool                                                           | 3642                      | 98.8  | 139                      | 83.7 | 112                | 3893              | 98.2 |
|             | Wound                                                                       | 26                        | N/A   | 16                       | N/A  | 0                  | 42                | N/A  |
|             | Urine                                                                       | 1                         | N/A   | 3                        | N/A  | 1                  | 5                 | N/A  |
|             | Other                                                                       | 11                        | N/A   | 4                        | N/A  | 0                  | 15                | N/A  |
|             | Missing                                                                     | 5                         | 0.1   | 4                        | 2.4  | 0                  | 9                 | 0.2  |
| <b>3.</b>   | <b>History of VRE</b>                                                       |                           |       |                          |      |                    |                   |      |
|             | No                                                                          | 3684                      | 100   | 166                      | 100  | 113                | 3963              | 100  |
|             | Yes                                                                         | 1                         | 0.0   | 0                        | 0.0  | 0                  | 1                 | 0.0  |
| <b>3.1.</b> | <b>Localization of VRE</b>                                                  |                           |       |                          |      |                    |                   |      |
|             | Anal/rectal/stool                                                           | 1                         | N/A   | 0                        | N/A  | 0                  | 1                 | N/A  |
|             | Missing                                                                     | 3684                      | 100.0 | 166                      | 100  | 113                | 3963              | 100  |
| <b>4.</b>   | <b>Hospital stay within the previous 12 months</b>                          |                           |       |                          |      |                    |                   |      |
|             | No                                                                          | 2656                      | 72.1  | 99                       | 59.6 | 59                 | 2814              | 71.0 |
|             | Yes                                                                         | 1022                      | 27.7  | 66                       | 39.8 | 54                 | 1142              | 28.8 |
|             | Missing                                                                     | 7                         | 0.2   | 1                        | 0.6  | 0                  | 8                 | 0.2  |
| <b>4.1.</b> | <b>Number</b>                                                               |                           |       |                          |      |                    |                   |      |
|             | 1                                                                           | 679                       | 18.4  | 30                       | 18.1 | 27                 | 736               | 18.6 |
|             | >1                                                                          | 242                       | 6.6   | 28                       | 16.9 | 11                 | 281               | 7.1  |
|             | Missing                                                                     | 2764                      | 75.0  | 108                      | 65.1 | 75                 | 2947              | 74.3 |
| <b>4.2.</b> | <b>Duration (in days)</b>                                                   |                           |       |                          |      |                    |                   |      |
|             | 0-3                                                                         | 412                       | 11.2  | 24                       | 14.5 | 24                 | 460               | 11.6 |
|             | 4-5                                                                         | 190                       | 5.2   | 5                        | 3.0  | 8                  | 203               | 5.1  |
|             | 6-10                                                                        | 131                       | 3.6   | 11                       | 6.6  | 7                  | 149               | 3.8  |
|             | 11-20                                                                       | 65                        | 1.8   | 5                        | 3.0  | 2                  | 72                | 1.8  |
|             | >20                                                                         | 122                       | 3.3   | 11                       | 6.6  | 5                  | 138               | 3.5  |
|             | Missing                                                                     | 2765                      | 75.0  | 110                      | 66.3 | 67                 | 2942              | 74.2 |
| <b>5.</b>   | <b>Treatment in dialysis department</b>                                     |                           |       |                          |      |                    |                   |      |
|             | No                                                                          | 3681                      | 99.9  | 166                      | 100  | 112                | 3959              | 99.9 |
|             | Yes                                                                         | 4                         | 0.1   | 0                        | 0.0  | 1                  | 5                 | 0.1  |
| <b>6.</b>   | <b>Parents working with living stock</b>                                    |                           |       |                          |      |                    |                   |      |
|             | No                                                                          | 3507                      | 95.2  | 158                      | 95.2 | 113                | 3778              | 95.3 |
|             | Yes                                                                         | 48                        | 1.3   | 1                        | 0.6  | 0                  | 49                | 1.2  |
|             | Missing                                                                     | 130                       | 3.5   | 7                        | 4.2  | 0                  | 137               | 3.5  |
| <b>7.</b>   | <b>Living in a care facility</b>                                            |                           |       |                          |      |                    |                   |      |
|             | No                                                                          | 3661                      | 99.3  | 161                      | 97.0 | 110                | 3932              | 99.2 |
|             | Yes                                                                         | 23                        | 0.6   | 5                        | 3.0  | 3                  | 31                | 0.8  |
|             | Missing                                                                     | 1                         | 0.0   | 0                        | 0.0  | 0                  | 1                 | 0.0  |
| <b>8.</b>   | <b>In-home nursing care</b>                                                 |                           |       |                          |      |                    |                   |      |
|             | No                                                                          | 3625                      | 98.4  | 151                      | 91.0 | 111                | 3887              | 98.1 |
|             | Yes                                                                         | 60                        | 1.6   | 14                       | 8.4  | 2                  | 76                | 1.9  |
|             | Missing                                                                     | 0                         | 0.0   | 1                        | 0.6  | 0                  | 1                 | 0.0  |
| <b>9.</b>   | <b>Attending a healthcare facility abroad within the previous 12 months</b> |                           |       |                          |      |                    |                   |      |
|             | No                                                                          | 3601                      | 97.7  | 162                      | 97.6 | 111                | 3874              | 97.7 |
|             | Yes                                                                         | 84                        | 2.3   | 4                        | 2.4  | 2                  | 90                | 2.3  |
| <b>9.1.</b> | <b>Number</b>                                                               |                           |       |                          |      |                    |                   |      |
|             | 1                                                                           | 47                        | N/A   | 4                        | N/A  | 2                  | 53                | N/A  |
|             | >1                                                                          | 10                        | N/A   | 0                        | N/A  | 0                  | 10                | N/A  |
|             | Missing                                                                     | 3628                      | 98.5  | 162                      | 97.6 | 111                | 3901              | 98.4 |
| <b>9.2.</b> | <b>Duration (in days)</b>                                                   |                           |       |                          |      |                    |                   |      |
|             | 0-3                                                                         | 37                        | N/A   | 2                        | N/A  | 1                  | 40                | N/A  |
|             | 4-5                                                                         | 8                         | N/A   | 0                        | N/A  | 0                  | 8                 | N/A  |
|             | 6-10                                                                        | 5                         | N/A   | 1                        | N/A  | 1                  | 7                 | N/A  |
|             | 11-20                                                                       | 2                         | N/A   | 1                        | N/A  | 0                  | 3                 | N/A  |
|             | >20                                                                         | 2                         | N/A   | 0                        | N/A  | 0                  | 2                 | N/A  |
|             | Missing                                                                     | 3631                      | 98.5  | 162                      | 97.6 | 111                | 3904              | 98.5 |

Abbreviations: AKK, Altona Children's Hospital; ICU, intensive care unit; MDRO, multi-drug-resistant organisms; MRGN, multi-drug-resistant gram-negative bacteria; MRSA, methicillin-resistant *Staphylococcus aureus*; n., number; N/A, not applicable; PEG, percutaneous endoscopic gastrostomy; VRE, vancomycin-resistant enterococcus. Percentages may not total 100 due to rounding. Missing, questions not answered. Results are based on 3851 observations.

**Table S2.** MDRO risk factors and MDRO carriage in children, collected at time of hospital admission, AKK Hamburg, Germany, 2018-2019 -part 2

| N            | Risk factor                                                                                               | MDRO negative<br>n = 3685 |      | MDRO positive<br>n = 166 |      | Missing<br>n = 113 | Total<br>n = 3964 |      |
|--------------|-----------------------------------------------------------------------------------------------------------|---------------------------|------|--------------------------|------|--------------------|-------------------|------|
|              |                                                                                                           | (n)                       | (%)  | (n)                      | (%)  | (n)                | (n)               | (%)  |
| <b>9.</b>    | <b>Attending a healthcare facility abroad within the previous 12 months</b>                               |                           |      |                          |      |                    |                   |      |
| <b>9.3.</b>  | <b>Continent</b>                                                                                          |                           |      |                          |      |                    |                   |      |
|              | Africa                                                                                                    | 5                         | N/A  | 0                        | N/A  | 0                  | 5                 | N/A  |
|              | Asia                                                                                                      | 5                         | N/A  | 1                        | N/A  | 0                  | 6                 | N/A  |
|              | Europe                                                                                                    | 42                        | N/A  | 1                        | N/A  | 2                  | 45                | N/A  |
|              | Eastern Europe                                                                                            | 9                         | N/A  | 1                        | N/A  | 0                  | 10                | N/A  |
|              | Southern Europe                                                                                           | 9                         | N/A  | 1                        | N/A  | 0                  | 10                | N/A  |
|              | North America                                                                                             | 3                         | N/A  | 0                        | N/A  | 0                  | 3                 | N/A  |
|              | South America                                                                                             | 1                         | N/A  | 0                        | N/A  | 0                  | 1                 | N/A  |
|              | Middle East                                                                                               | 5                         | N/A  | 0                        | N/A  | 0                  | 5                 | N/A  |
|              | Australia/New Zealand                                                                                     | 2                         | N/A  | 0                        | N/A  | 0                  | 2                 | N/A  |
|              | Missing                                                                                                   | 3604                      | 97.8 | 162                      | 97.6 | 111                | 3877              | 97.8 |
| <b>10.</b>   | <b>Treatment in ICU for more than seven days within the previous 12 months</b>                            |                           |      |                          |      |                    |                   |      |
|              | No                                                                                                        | 3580                      | 97.2 | 151                      | 91.0 | 113                | 3844              | 97.0 |
|              | Yes                                                                                                       | 100                       | 2.7  | 14                       | 8.4  | 0                  | 114               | 2.9  |
|              | Missing                                                                                                   | 5                         | 0.1  | 1                        | 0.6  | 0                  | 6                 | 0.2  |
| <b>11.</b>   | <b>Contact with a treated family member in ICU for more than seven days within the previous 12 months</b> |                           |      |                          |      |                    |                   |      |
|              | No                                                                                                        | 3366                      | 91.3 | 148                      | 89.2 | 113                | 3627              | 91.5 |
|              | Yes                                                                                                       | 52                        | 1.4  | 0                        | 0.0  | 0                  | 52                | 1.3  |
|              | Missing                                                                                                   | 267                       | 7.2  | 18                       | 10.8 | 0                  | 285               | 7.2  |
| <b>12.</b>   | <b>Having a pet</b>                                                                                       |                           |      |                          |      |                    |                   |      |
|              | No                                                                                                        | 2303                      | 62.5 | 104                      | 62.7 | 71                 | 2478              | 62.5 |
|              | Yes                                                                                                       | 1123                      | 30.5 | 50                       | 30.1 | 33                 | 1206              | 30.4 |
|              | Missing                                                                                                   | 259                       | 7.0  | 12                       | 7.2  | 9                  | 280               | 7.1  |
| <b>13.</b>   | <b>Breastfeeding during the last 12 months</b>                                                            |                           |      |                          |      |                    |                   |      |
|              | No                                                                                                        | 2894                      | 78.5 | 113                      | 68.1 | 105                | 3112              | 78.5 |
|              | Yes                                                                                                       | 760                       | 20.6 | 51                       | 30.7 | 8                  | 819               | 20.7 |
|              | Missing                                                                                                   | 31                        | 0.8  | 2                        | 1.2  | 0                  | 33                | 0.8  |
| <b>14.</b>   | <b>Known contact with a MDRO carrier</b>                                                                  |                           |      |                          |      |                    |                   |      |
|              | No                                                                                                        | 3659                      | 99.3 | 164                      | 98.8 | 113                | 3936              | 99.3 |
|              | Yes                                                                                                       | 26                        | 0.7  | 2                        | 1.2  | 0                  | 28                | 0.7  |
| <b>15.</b>   | <b>Background with known high MRSA prevalence</b>                                                         |                           |      |                          |      |                    |                   |      |
|              | No                                                                                                        | 3614                      | 98.1 | 158                      | 95.2 | 109                | 3881              | 97.9 |
|              | Yes                                                                                                       | 71                        | 1.9  | 8                        | 4.8  | 4                  | 83                | 2.1  |
| <b>16.</b>   | <b>Abroad for &gt; six weeks within the previous six months</b>                                           |                           |      |                          |      |                    |                   |      |
|              | No                                                                                                        | 3554                      | 96.4 | 161                      | 97.0 | 109                | 3824              | 96.5 |
|              | Yes                                                                                                       | 113                       | 3.1  | 4                        | 2.4  | 3                  | 120               | 3.0  |
|              | Missing                                                                                                   | 18                        | 0.5  | 1                        | 0.6  | 1                  | 20                | 0.5  |
| <b>17.</b>   | <b>Refugee status within the previous 12 months</b>                                                       |                           |      |                          |      |                    |                   |      |
|              | No                                                                                                        | 3656                      | 99.2 | 161                      | 97.0 | 113                | 3930              | 99.1 |
|              | Yes                                                                                                       | 25                        | 0.7  | 2                        | 1.2  | 0                  | 27                | 0.7  |
|              | Missing                                                                                                   | 4                         | 0.1  | 3                        | 1.8  | 0                  | 7                 | 0.2  |
| <b>17.1</b>  | <b>Moving in within the previous three months</b>                                                         |                           |      |                          |      |                    |                   |      |
|              | No                                                                                                        | 3674                      | 99.7 | 163                      | 98.2 | 113                | 3950              | 99.6 |
|              | Yes                                                                                                       | 6                         | 0.2  | 0                        | 0.0  | 0                  | 6                 | 0.2  |
|              | Missing                                                                                                   | 5                         | 0.1  | 3                        | 1.8  | 0                  | 8                 | 0.2  |
| <b>17.2</b>  | <b>Staying at a community center within the previous three months</b>                                     |                           |      |                          |      |                    |                   |      |
|              | No                                                                                                        | 3668                      | 99.5 | 162                      | 97.6 | 113                | 3943              | 99.5 |
|              | Yes                                                                                                       | 11                        | 0.3  | 1                        | 0.6  | 0                  | 12                | 0.3  |
|              | Missing                                                                                                   | 6                         | 0.2  | 3                        | 1.8  | 0                  | 9                 | 0.2  |
| <b>18.</b>   | <b>Chronic skin disease</b>                                                                               |                           |      |                          |      |                    |                   |      |
|              | No                                                                                                        | 3529                      | 95.8 | 158                      | 95.2 | 110                | 3797              | 95.8 |
|              | Yes                                                                                                       | 155                       | 4.2  | 8                        | 4.8  | 3                  | 166               | 4.2  |
|              | Missing                                                                                                   | 1                         | 0.0  | 0                        | 0.0  | 0                  | 1                 | 0.0  |
| <b>18.1.</b> | <b>Type</b>                                                                                               |                           |      |                          |      |                    |                   |      |
|              | Chronic wound                                                                                             | 8                         | N/A  | 2                        | N/A  | 0                  | 10                | N/A  |
|              | Ulcer                                                                                                     | 3                         | N/A  | 0                        | N/A  | 0                  | 3                 | N/A  |
|              | Deep soft tissue infection                                                                                | 7                         | N/A  | 1                        | N/A  | 0                  | 8                 | N/A  |
|              | Neurodermatitis                                                                                           | 102                       | 2.8  | 4                        | 2.4  | 2                  | 108               | 2.7  |
|              | Other                                                                                                     | 29                        | N/A  | 1                        | N/A  | 1                  | 31                | N/A  |
|              | Missing                                                                                                   | 3536                      | 96.0 | 158                      | 95.2 | 110                | 3804              | 96.0 |
| <b>19.</b>   | <b>Chronic condition requiring permanent care</b>                                                         |                           |      |                          |      |                    |                   |      |
|              | No                                                                                                        | 3512                      | 95.3 | 136                      | 81.9 | 97                 | 3745              | 94.5 |
|              | Yes                                                                                                       | 170                       | 4.6  | 29                       | 17.5 | 16                 | 215               | 5.4  |
|              | Missing                                                                                                   | 3                         | 0.1  | 1                        | 0.6  | 0                  | 4                 | 0.1  |

Abbreviations: AKK, Altona Children's Hospital; ICU, intensive care unit; MDRO, multi-drug-resistant organisms; MRGN, multi-drug-resistant gram-negative bacteria; MRSA, methicillin-resistant Staphylococcus aureus; n., number; N/A, not applicable; PEG, percutaneous endoscopic gastrostomy; VRE, vancomycin-resistant enterococcus. Percentages may not total 100 due to rounding. Missing, questions not answered. Results are based on 3851 observations.

**Table S3.** MDRO risk factors and MDRO carriage in children, collected at time of hospital admission, AKK Hamburg, Germany, 2018-2019 -part 3

| N            | Risk factor                                                                              | MDRO negative<br>n = 3685 |      | MDRO positive<br>n = 166 |      | Missing<br>n = 113 | Total<br>n = 3964 |      |
|--------------|------------------------------------------------------------------------------------------|---------------------------|------|--------------------------|------|--------------------|-------------------|------|
|              |                                                                                          | (n)                       | (%)  | (n)                      | (%)  | (n)                | (n)               | (%)  |
| <b>20.</b>   | <b>Antibiotic therapy within the previous 6 months</b>                                   |                           |      |                          |      |                    |                   |      |
|              | No                                                                                       | 2961                      | 80.4 | 104                      | 62.7 | 89                 | 3154              | 79.6 |
|              | Yes                                                                                      | 590                       | 16.0 | 51                       | 30.7 | 19                 | 660               | 16.6 |
|              | Missing                                                                                  | 134                       | 3.6  | 11                       | 6.6  | 5                  | 150               | 3.8  |
| <b>20.1.</b> | <b>Oral continuous prophylaxis</b>                                                       |                           |      |                          |      |                    |                   |      |
|              | No                                                                                       | 3498                      | 94.9 | 151                      | 91.0 | 105                | 3754              | 94.7 |
|              | Yes                                                                                      | 36                        | N/A  | 4                        | N/A  | 3                  | 43                | N/A  |
|              | Missing                                                                                  | 151                       | 4.1  | 11                       | 6.6  | 5                  | 167               | 4.2  |
| <b>20.2.</b> | <b>Number of oral therapies</b>                                                          |                           |      |                          |      |                    |                   |      |
|              | None                                                                                     | 3047                      | 82.7 | 113                      | 68.1 | 95                 | 3255              | 82.1 |
|              | 1                                                                                        | 314                       | 8.5  | 25                       | 15.1 | 9                  | 348               | 8.8  |
|              | 2-3                                                                                      | 102                       | 2.8  | 10                       | 6.0  | 0                  | 112               | 2.8  |
|              | >3                                                                                       | 40                        | N/A  | 4                        | N/A  | 0                  | 44                | N/A  |
|              | Missing                                                                                  | 182                       | 4.9  | 14                       | 8.4  | 9                  | 205               | 5.2  |
| <b>20.3.</b> | <b>Number of intravenous therapies</b>                                                   |                           |      |                          |      |                    |                   |      |
|              | None                                                                                     | 3406                      | 92.4 | 139                      | 83.7 | 101                | 3646              | 92.0 |
|              | 1                                                                                        | 56                        | 1.5  | 6                        | 3.6  | 1                  | 63                | 1.6  |
|              | 2-3                                                                                      | 25                        | N/A  | 2                        | N/A  | 0                  | 27                | N/A  |
|              | >3                                                                                       | 15                        | N/A  | 5                        | N/A  | 2                  | 22                | N/A  |
|              | Missing                                                                                  | 183                       | 5.0  | 14                       | 8.4  | 9                  | 206               | 5.2  |
| <b>20.4.</b> | <b>Duration of treatment (days)</b>                                                      |                           |      |                          |      |                    |                   |      |
|              | ≤7                                                                                       | 215                       | 5.8  | 17                       | 10.2 | 6                  | 238               | 6.0  |
|              | >7                                                                                       | 164                       | 4.5  | 18                       | 10.8 | 6                  | 188               | 4.7  |
|              | Missing                                                                                  | 3306                      | 89.7 | 131                      | 78.9 | 101                | 3538              | 89.3 |
| <b>21.</b>   | <b>Indwelling catheter or stoma</b>                                                      |                           |      |                          |      |                    |                   |      |
|              | No                                                                                       | 3565                      | 96.7 | 145                      | 87.3 | 108                | 3818              | 96.3 |
|              | Yes                                                                                      | 120                       | 3.3  | 21                       | 12.7 | 5                  | 146               | 3.7  |
| <b>21.1.</b> | <b>Type</b>                                                                              |                           |      |                          |      |                    |                   |      |
|              | Gastrostomy/PEG/Anus praeter                                                             | 33                        | N/A  | 8                        | N/A  | 1                  | 42                | N/A  |
|              | Tracheostomy                                                                             | 13                        | N/A  | 5                        | N/A  | 0                  | 18                | N/A  |
|              | Central venous catheter/ Broviac catheter/ Port                                          | 10                        | N/A  | 1                        | N/A  | 2                  | 13                | N/A  |
|              | Transurethral/ suprapubic catheter                                                       | 3                         | N/A  | 0                        | N/A  | 0                  | 3                 | N/A  |
|              | Baclofen pump                                                                            | 3                         | N/A  | 3                        | N/A  | 0                  | 6                 | N/A  |
|              | Ventriculoperitoneal/ventriculo-atrial shunt                                             | 23                        | N/A  | 3                        | N/A  | 2                  | 28                | N/A  |
|              | Insulin pump                                                                             | 31                        | N/A  | 1                        | N/A  | 0                  | 32                | N/A  |
|              | Missing                                                                                  | 3569                      | 96.9 | 145                      | 87.3 | 108                | 3822              | 96.4 |
| <b>22.</b>   | <b>Major surgery within the previous 12 months</b>                                       |                           |      |                          |      |                    |                   |      |
|              | No                                                                                       | 3480                      | 94.4 | 154                      | 92.8 | 83                 | 3717              | 93.8 |
|              | Yes                                                                                      | 199                       | 5.4  | 12                       | 7.2  | 25                 | 236               | 6.0  |
|              | Missing                                                                                  | 6                         | 0.2  | 0                        | 0.0  | 5                  | 11                | 0.3  |
| <b>22.1.</b> | <b>Localization</b>                                                                      |                           |      |                          |      |                    |                   |      |
|              | Vessel                                                                                   | 9                         | N/A  | 0                        | N/A  | 0                  | 9                 | N/A  |
|              | Heart                                                                                    | 4                         | N/A  | 2                        | N/A  | 1                  | 7                 | N/A  |
|              | Bone                                                                                     | 117                       | 3.2  | 3                        | 1.8  | 23                 | 143               | 3.6  |
|              | Abdomen                                                                                  | 50                        | N/A  | 7                        | N/A  | 1                  | 58                | N/A  |
|              | Missing                                                                                  | 3505                      | 95.1 | 154                      | 92.8 | 88                 | 3747              | 94.5 |
| <b>23.</b>   | <b>Urogenital anomalies or recurrent urological infections</b>                           |                           |      |                          |      |                    |                   |      |
|              | No                                                                                       | 3564                      | 96.7 | 157                      | 94.6 | 110                | 3831              | 96.6 |
|              | Yes                                                                                      | 119                       | 3.2  | 9                        | 5.4  | 2                  | 130               | 3.3  |
|              | Missing                                                                                  | 2                         | 0.1  | 0                        | 0.0  | 1                  | 3                 | 0.1  |
| <b>24.</b>   | <b>Family member working in healthcare facilities with regular patient contact</b>       |                           |      |                          |      |                    |                   |      |
|              | No                                                                                       | 2809                      | 76.2 | 136                      | 81.9 | 91                 | 3036              | 76.6 |
|              | Yes                                                                                      | 507                       | 13.8 | 15                       | 9.0  | 18                 | 540               | 13.6 |
|              | Missing                                                                                  | 369                       | 10.0 | 15                       | 9.0  | 4                  | 388               | 9.8  |
| <b>24.1.</b> | <b>Place</b>                                                                             |                           |      |                          |      |                    |                   |      |
|              | Hospital                                                                                 | 158                       | 4.3  | 6                        | 3.6  | 8                  | 172               | 4.3  |
|              | ICU                                                                                      | 17                        | N/A  | 0                        | N/A  | 0                  | 17                | N/A  |
|              | Doctor's office                                                                          | 129                       | 3.5  | 4                        | 2.4  | 4                  | 137               | 3.5  |
|              | Nursing home                                                                             | 83                        | 2.3  | 3                        | 1.8  | 4                  | 90                | 2.3  |
|              | Other                                                                                    | 81                        | 2.2  | 1                        | 0.6  | 1                  | 83                | 2.1  |
|              | Missing                                                                                  | 3217                      | 87.3 | 152                      | 91.6 | 96                 | 3465              | 87.4 |
| <b>25.</b>   | <b>Stay at a neonatology unit for more than seven days within the previous 12 months</b> |                           |      |                          |      |                    |                   |      |
|              | No                                                                                       | 3552                      | 96.4 | 149                      | 89.8 | 113                | 3814              | 96.2 |
|              | Yes                                                                                      | 131                       | 3.6  | 16                       | 9.6  | 0                  | 147               | 3.7  |
|              | Missing                                                                                  | 2                         | 0.1  | 1                        | 0.6  | 0                  | 3                 | 0.1  |

Abbreviations: AKK, Altona Children's Hospital; ICU, intensive care unit; MDRO, multi-drug-resistant organisms; MRGN, multi-drug-resistant gram-negative bacteria; MRSA, methicillin-resistant Staphylococcus aureus; n., number; N/A, not applicable; PEG, percutaneous endoscopic gastrostomy; VRE, vancomycin-resistant enterococcus. Percentages may not total 100 due to rounding. Missing, questions not answered. Results are based on 3851 observations.
